# Supplementary material for: Podocyte injury damages podocytes in chimeric organoids
Source: Research Square preprint supplement (doi:10.21203/rs.3.rs-7373933/v1), 2025-09-17

## Supplementary Tables

**Table S1**

| PCR primers for genotyping      |                       |                          |                                 |
|---------------------------------|-----------------------|--------------------------|---------------------------------|
| Transgene                       | primer 1              | primer 2                 | product size                    |
| Nphs1-hCD25                     | GTTTATTATCAGTGCGTCCAG | CTTGTCATCGTCGTCCTTGTA    | 409 bp                          |
| Nphs1-Cre                       | AGGTTTCGTTCACTCATGGA  | TCGACCAGTTTAGTTACCC      | 235 bp                          |
| <i>Rpl22<sup>m1.1Psam</sup></i> | GGGAGGCTTGCTGGATATG   | TTTCCAGACACAGGCTAAGTACAC | 290 bp<br>(243 bp in wild-type) |

**Table S2**

|                          | Company                   | Catalogue | dilution, concentration | pretreatment |
|--------------------------|---------------------------|-----------|-------------------------|--------------|
| for paraffin sections    |                           |           |                         |              |
| Nephrin                  | Progen                    | GP-N2     | 1/100                   | heat         |
| HA-tag                   | Cell Signaling technology | #3724     | 1/8000                  | heat         |
| hCD25                    | Thermo Scientific         | MS-1088   | (1/20)                  | heat         |
| WT1                      | Abcam                     | ab89901   | 1/2000                  | heat         |
| Podocalyxin              | R&D systems               | MAB1556   | 1/8000                  | trypsin      |
| podocin                  | Sigma-Aldrich             | P0372     | 1/5000                  | pepsin       |
| Biotin-LTL               | Vector                    | B-1325    | 10 µg/ml                |              |
| for fluorescent staining |                           |           |                         |              |
| FITC-LTL                 | Vector                    | FL-1321   | 10 µg/ml                |              |
| WT1(f)                   | Abcam                     | ab89901   | 1/2000                  |              |
| for immunoprecipitation  |                           |           |                         |              |
| HA.11 epitope            | BioLegend                 | 901501    | 12.5 µg/ml              |              |

**Table S3**

| Primers for quantitative PCR |                            |                            |
|------------------------------|----------------------------|----------------------------|
| gene                         | Primer1                    | Primer2                    |
| <i>Actb</i>                  | ATGAGCTGCCTGACGGCCAGGTCATC | TGGTACCACCAGACAGCACTGTGTTG |
| <i>Gadd45b</i>               | CTGCCTCCTGGTCACGAA         | TTGCCTCTGCTCTCTTCACA       |
| <i>P2rx7</i>                 | AGCAGAGGTGACGGAGAATG       | CTGCACTTGGCCTTCTGACT       |
| <i>Cxcl1</i>                 | GACTCCAGCCACACTCCAAC       | TGACAGCGCAGCTCATTG         |
| <i>Egr1</i>                  | CCTATGAGCACCTGACCACA       | TCGTTTGGCTGGGATAACTC       |
| <i>Lrp2</i>                  | AGGCTCCGACTTCGTAACTG       | GCATGGTGATGGGGAGTT         |
| <i>Tnfrif2</i>               | GCCGAAAGCTACCACTACCA       | GAAGCTCCTGTGCCAACTTC       |
| <i>Gja1</i>                  | GTGCCGGCTTCACTTTCA         | GGAGTAGGCTTGGACCTTGTC      |
| <i>Gja3</i>                  | CCCCAGTGTCTGAGATCGAG       | AGGCCGAACAAGAGCAAG         |
| <i>Gja5</i>                  | CAGGGAGGAGGAAAGGAAGC       | ACTGTGGAGTGCTTGTGGAC       |
| <i>Gjc1</i>                  | ACAGGAGTTCTGGTGAACAGG      | TTCCTCTAGCAGGCGAGTC        |

**Table S4**

| TaqMan Gene Expression Assays |              |               |
|-------------------------------|--------------|---------------|
| gene                          | Company      | Assay ID      |
| <i>Nphs1</i>                  | ThermoFisher | Mm00497828_m1 |
| <i>Nphs2</i>                  | ThermoFisher | Mm00499929_m1 |
| <i>Wt1</i>                    | ThermoFisher | Mm00460570_m1 |
| <i>hCD25</i>                  | ThermoFisher | Hs00166229_m1 |

## Supplementary Figure Legends

**Figure S1.** NEP25/Ribotag organoids treated with LMB2 for 3 days. The expression level of nephrin is reduced, whereas megalin and LTL staining is retained. Panels (a–d) represent the equivalent visual fields of the serial sections. Scale bar: 50  $\mu$  m.

**Figure S2.** NEP25/Ribotag organoids with or without LMB2 treatment (2 days). In control organoids, podocytes strongly express WT1, HA, podocin, and nephrin. After LMB2 treatment, a few podocyte clusters remained and retained WT1 and HA expression, but the expression levels of podocin and nephrin are reduced. Panels (a–e) and (f–j) represent the equivalent visual fields of the serial sections. Scale bar: 20  $\mu$  m.

**Figure S3.** Podocyte injury does not propagate between organoids. NEP25 and Ribotag organoids were cocultured on a single Transwell membrane. Without LMB2, both organoid types express podocin (a, b). After 3 days of LMB2 treatment, the expression of podocin is markedly suppressed in NEP25 organoids (arrows, c) but not in Ribotag organoids (d). Scale bar: 20  $\mu$  m.

**Figure S4.** Effects of A83-01, SAR7334, and IKK-16 on indirect podocin suppression in chimeric organoids. LMB2 treatment for 2 days reduces podocin staining (b) despite the presence of HA(+) podocytes (a). Cotreatment with A83-01 (TGF- $\beta$  inhibitor) (c and d), SAR7334 (TRPC6 inhibitor) (e and f), or

IKK-16 (NF- $\kappa$ B inhibitor)(g and h) does not restore podocin expression. Scale bar: 50  $\mu$  m.

**Figure S5.** Connexin mRNA expression in mosaic mice and organoids. (a–d) hCD25(+) and hCD25(–) podocytes were isolated from mosaic mice either untreated (n = 3) or 7 days post-LMB2 injection (n = 5). Quantitative RT-PCR was performed using *Actb* as a control. Data are presented relative to heart RNA from a wild-type mouse. (e) Ratio of LMB2-treated to control polysomal RNA in NEP25/Ribotag organoids (n = 6) and chimeric organoids after 2 days (n = 6) or 4 days (n = 8) of LMB2 treatment. In NEP25/Ribotag organoids, IP RNA is derived from hCD25(+) podocytes. In chimeric organoids, IP RNA is derived from hCD25(–) podocytes. *Gja3* mRNA was undetectable in two IP samples of chimeric organoids treated with LMB2 for 4 days, which are not shown in the graph. LMB2 significantly reduces the mRNA expression level of *Gja3* in NEP25/Ribotag and chimeric organoids ( $p < 0.01$ ).

**Figure S6.** *Tnfaip2* mRNA expression in mosaic mice and organoids. (a) hCD25(+) and hCD25(–) podocytes were isolated from mosaic mice without LMB2 (n = 3) or 7 days post-LMB2 injection (n = 5). *Tnfaip2* mRNA levels were measured via quantitative RT-PCR, normalized to *Actb*, and expressed relative to total kidney RNA from a wild-type mouse. (b) Ratio of LMB2-treated to control polysomal RNA in NEP25/Ribotag organoids (n = 6) and chimeric organoids after 2 days (n = 6) or 4 days (n = 8) of LMB2 treatment. In NEP25/Ribotag organoids, IP RNA is derived from hCD25(+) podocytes. In chimeric organoids, IP RNA is derived from hCD25(–) podocytes. LMB2

significantly reduces the mRNA expression level of *Tnfaip2* in NEP25/Ribotag organoids ( $p < 0.01$ ) but not in chimeric organoids.

Figure S1

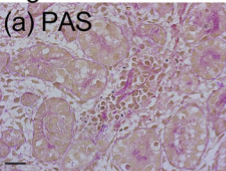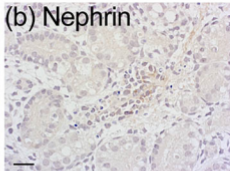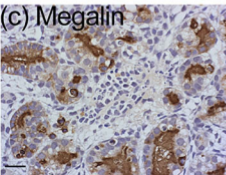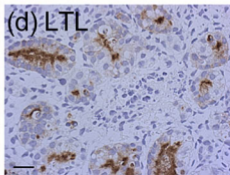

Figure S2

Control

LMB2 (2 days)

PAS

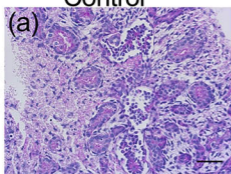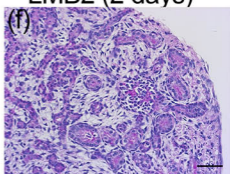

WT1

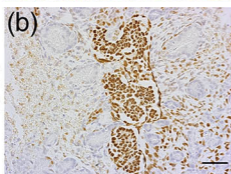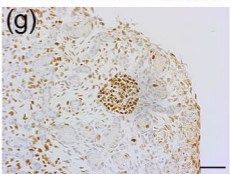

HA

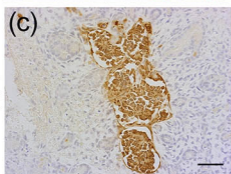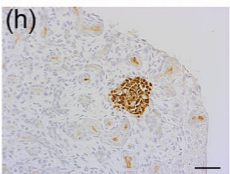

Podocin

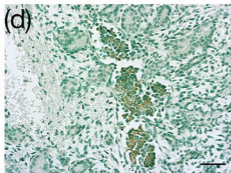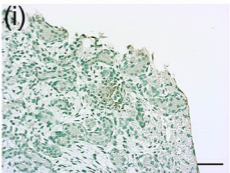

Nephrin

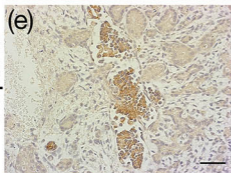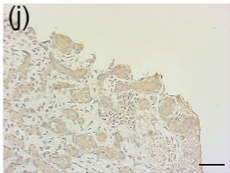

Figure S3

LMB2 (-)

LMB2 (+)

NEP25

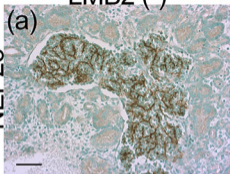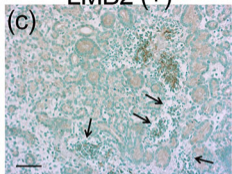

Ribotag

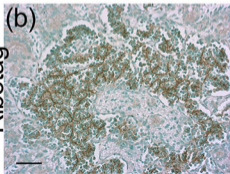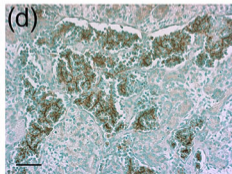

Figure S4

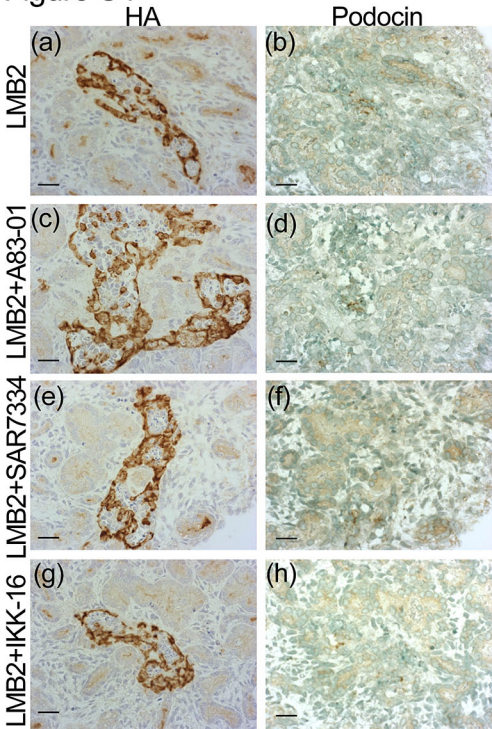

Figure S5

(a) *Gja1* relative amount

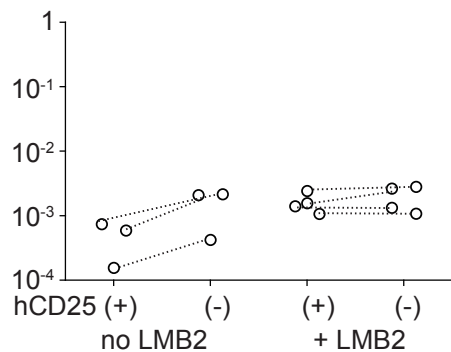

(b) *Gja3* relative amount

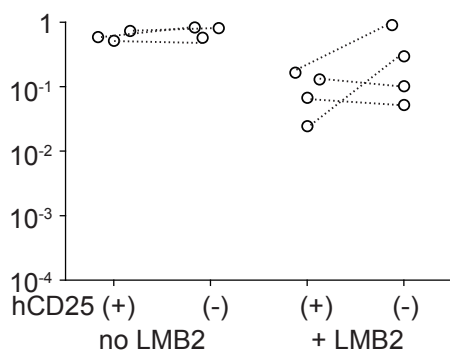

(c) *Gja5* relative amount

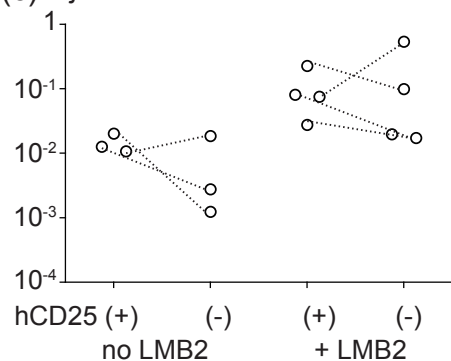

(d) *Gjc1* relative amount

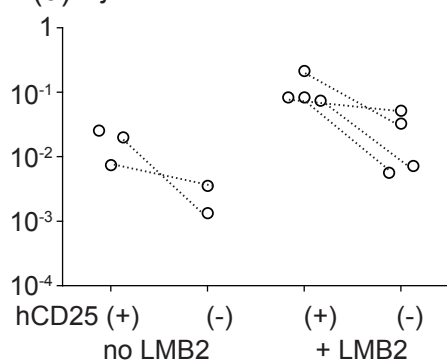

(e) *Gja3* LMB2/Cont ratio

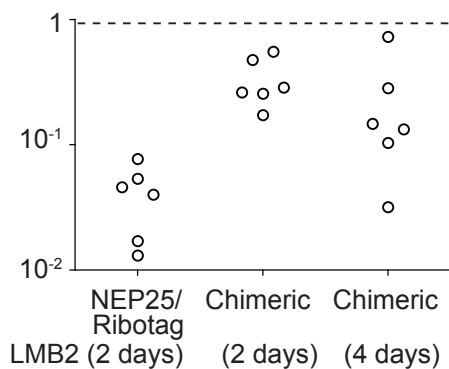

Figure S6

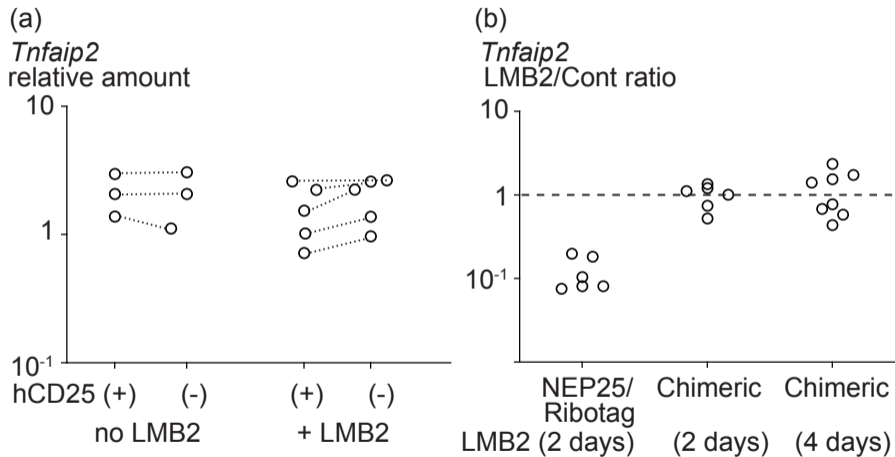

Supplement: Supplementary file 1 [file 8de629b9185fd0e555bde4a3.pdf]
